# Supplementary material for: Modulation of Insulin Amyloid Fibrillization in Imidazolium-Based Ionic Liquids with Hofmeister Series Anions
Source: MDPI journal article supplement (doi:10.3390/ijms24119699), 2023-06-02
Supplement: s1 [file s1]

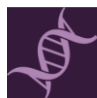

## SUPPLEMENT

### CENTRIFUGATION PROTOCOL

The centrifugation process was performed using *Amicon*® 10K filters. The procedure is as follows: (I) concentrating the sample – (II) removing the filtrate – (III) resuspending the concentrated sample with control solution [ultrapure water pH 1.6] (i.e., buffer exchange) – (IV) re-concentrating the sample. This procedure may be repeated until the acceptable buffer threshold is reached. The manufacturer assumes a 5% sample loss at 100-fold concentration. Filter adsorption depends on the sample concentration, pH, temperature, and duration of sample-filter contact.

The removal of IL solutions from fibril samples (containing 20  $\mu$ M insulin fibrils) and concentrating fibrils to achieve higher value for ATR-FTIR measurements was performed in the following steps:

- 1) 500  $\mu$ L of the sample solution was placed into the filter, followed by centrifugation (spinning) for 15 minutes at 14 000 rcf (concentrated sample stays in the filter)
- 2) 500  $\mu$ L of the sample solution was added to the concentrate, followed by centrifugation for 15 minutes at 14 000 rcf (this step was repeated 3-times)
- 3) 300  $\mu$ L of control solution was added to the sample concentrate (resuspension), followed by centrifugation for 15 minutes at 14 000 rcf
- 4) the obtained final concentrate (~50  $\mu$ L) in the filter was invertedly centrifuged for 1 minute at 1000 rcf (i.e., transferring the sample into the test tube)

During the process, the IL solutions were removed from fibril samples (buffer exchange).

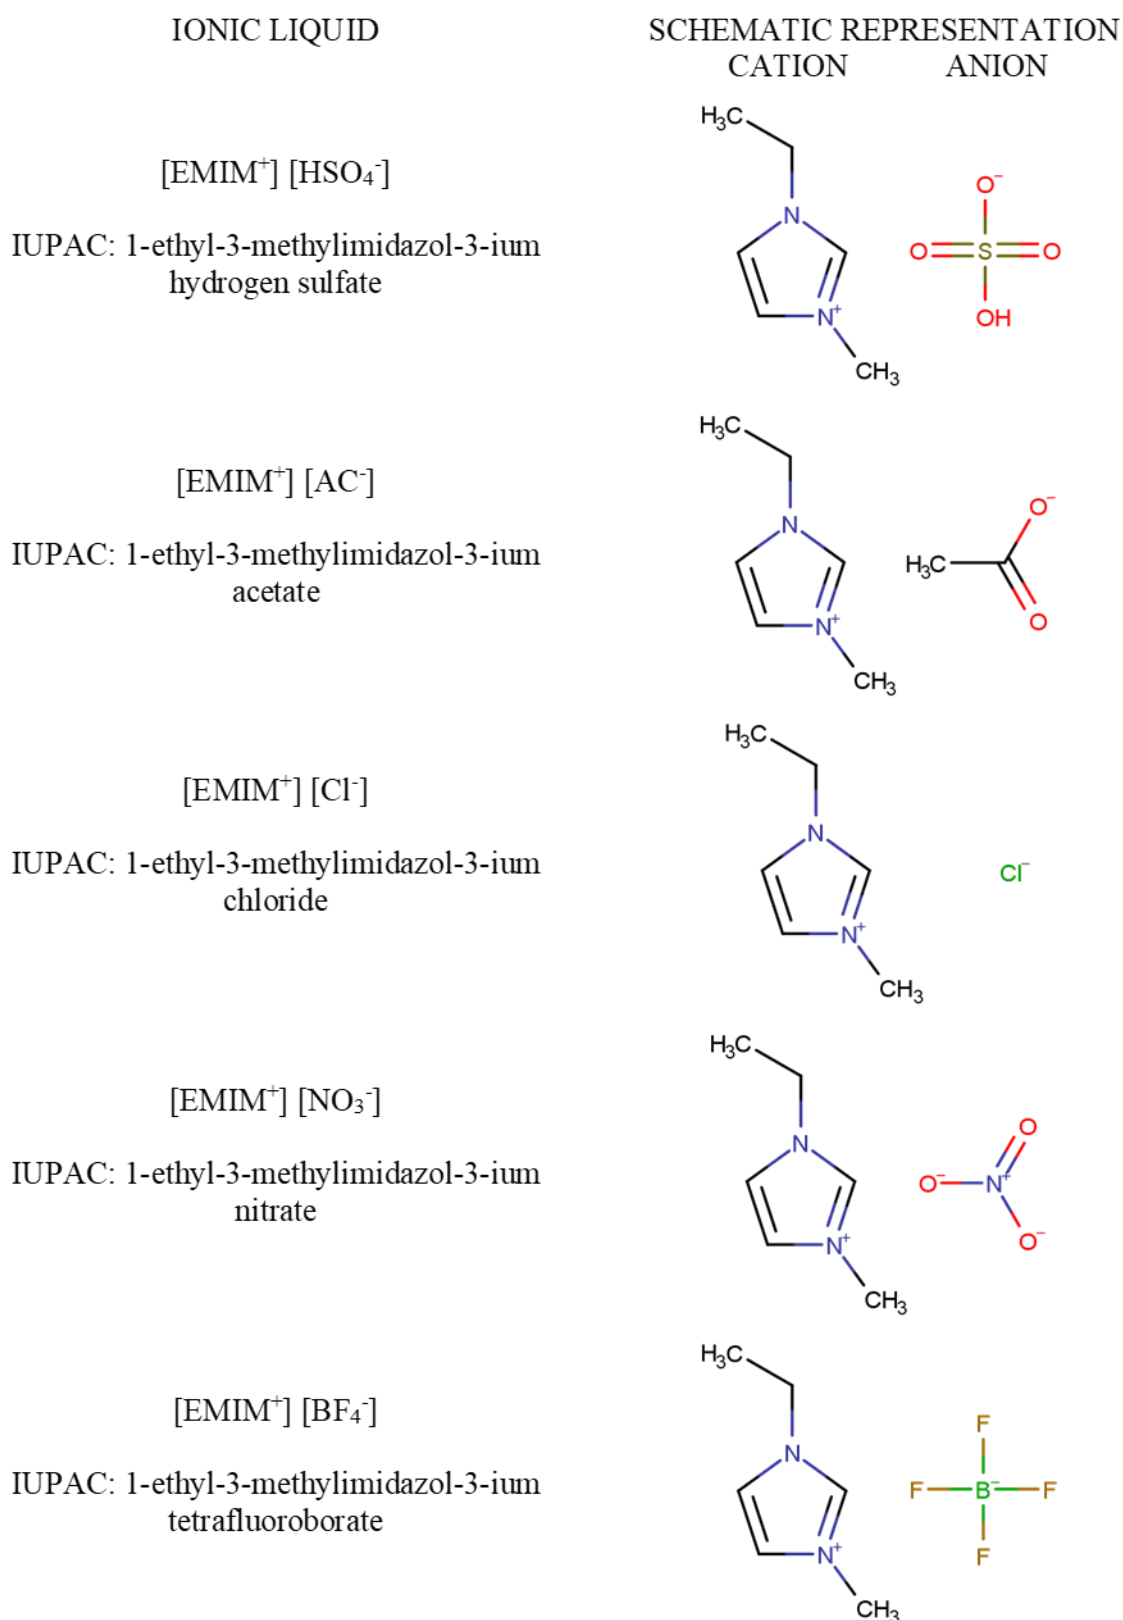

**Figure S1.** Schematic representation of studied ionic liquids.

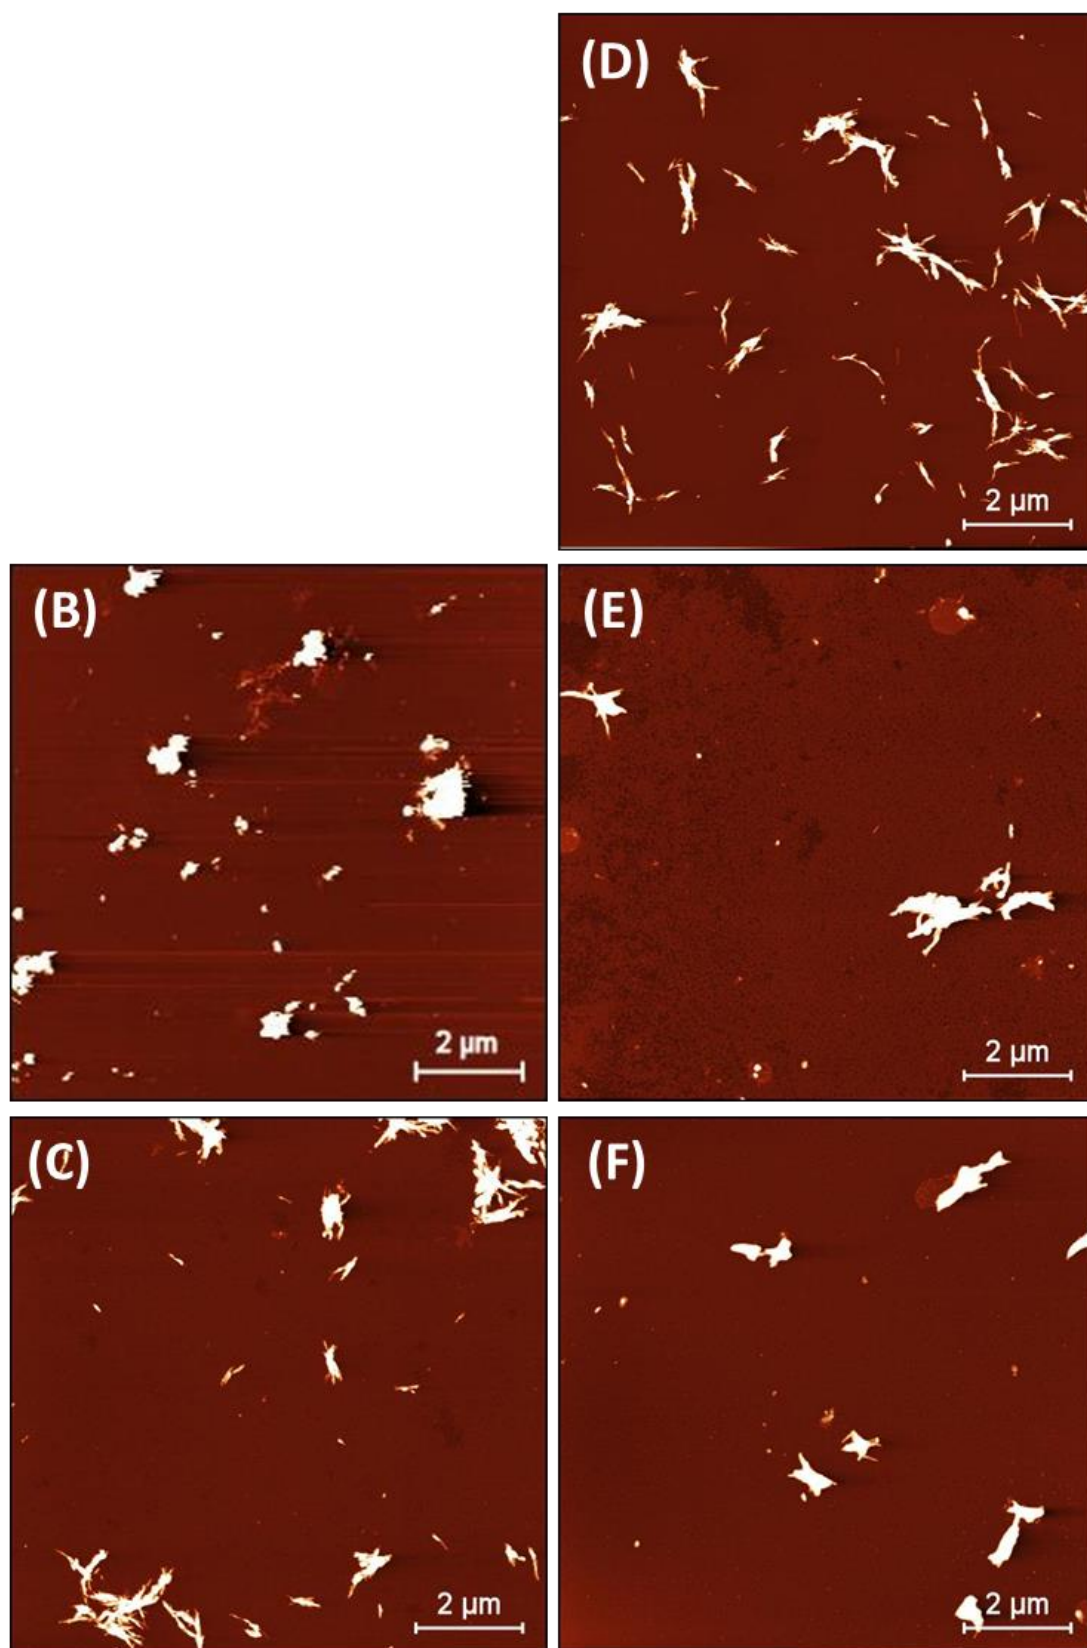

**Figure S2.** AFM images of insulin fibrils formed in the presence of 100 mM ILs: (B) EMIM HSO<sub>4</sub> 100 mM, (C) EMIM AC 100 mM, (D) EMIM Cl 100 mM, (E) EMIM NO<sub>3</sub> 100 mM, (F) EMIM BF<sub>4</sub> 100 mM.

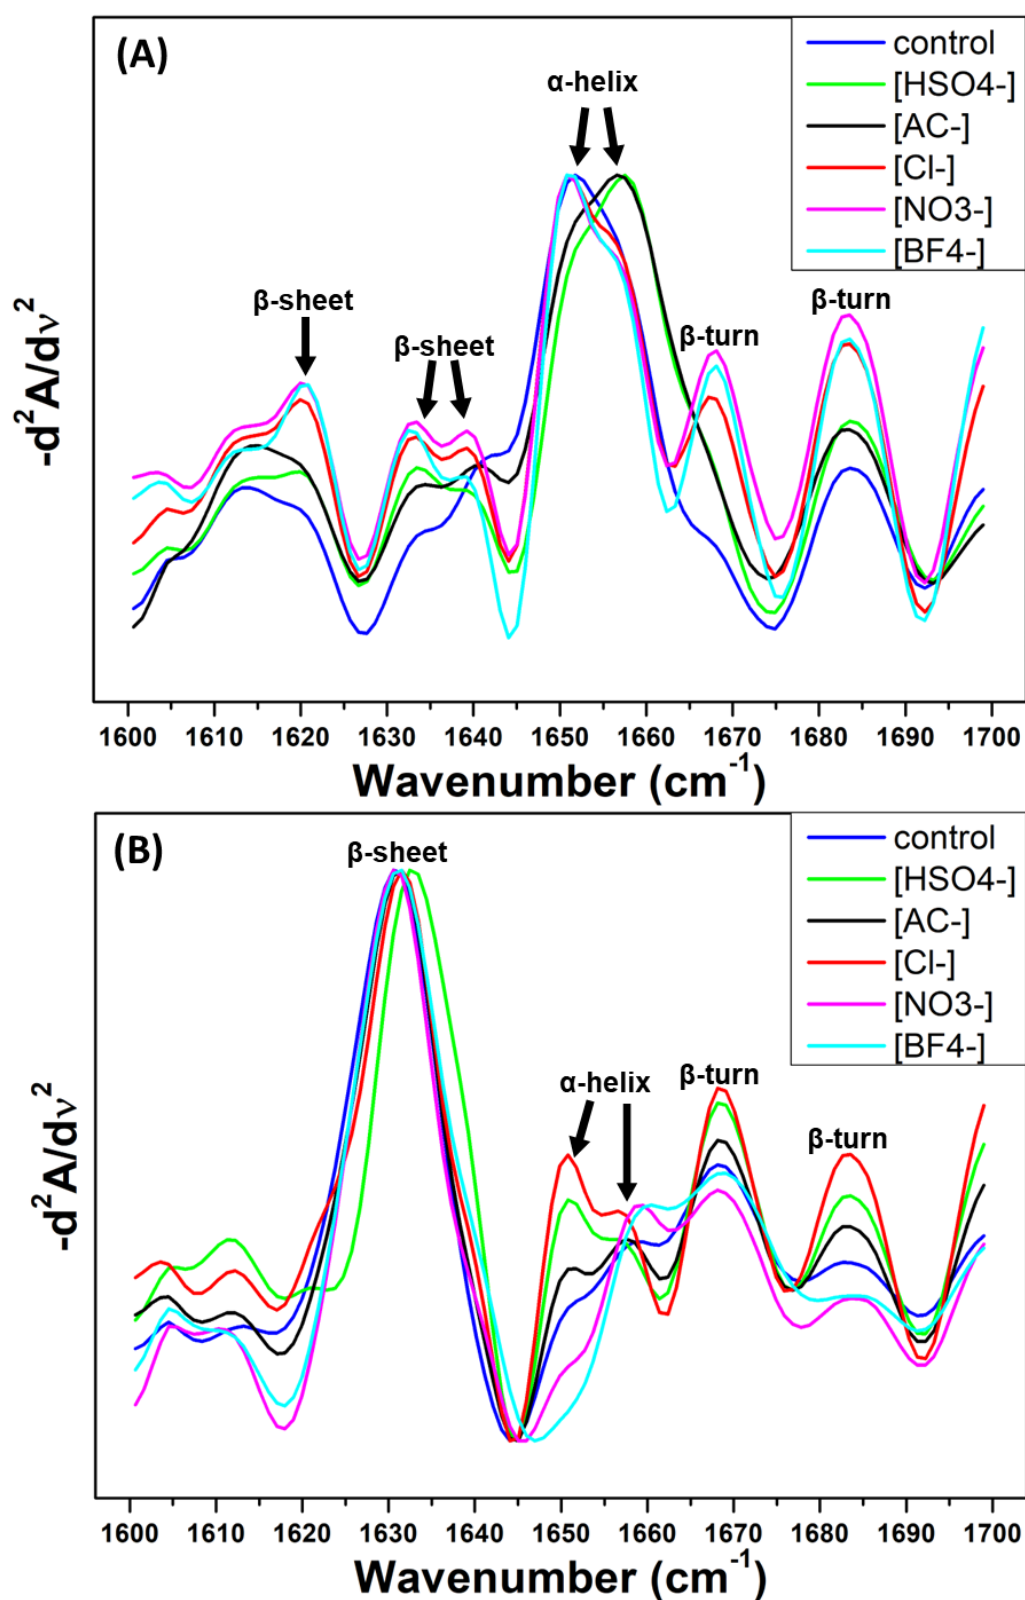

**Figure S3.** Second derivative of the Amide I band of (A) insulin and (B) insulin amyloid fibrils. Frequencies were assigned to particular corresponding structures according Yang<sup>1</sup>.

<sup>1</sup> 1. Yang, H.; Yang, S.; Kong, J.; Dong, A.; Yu, S. Obtaining Information about Protein Secondary Structures in Aqueous Solution Using Fourier Transform IR Spectroscopy. *Nat. Protoc.* **2015**, *10*, 382–396, doi:10.1038/nprot.2015.024.

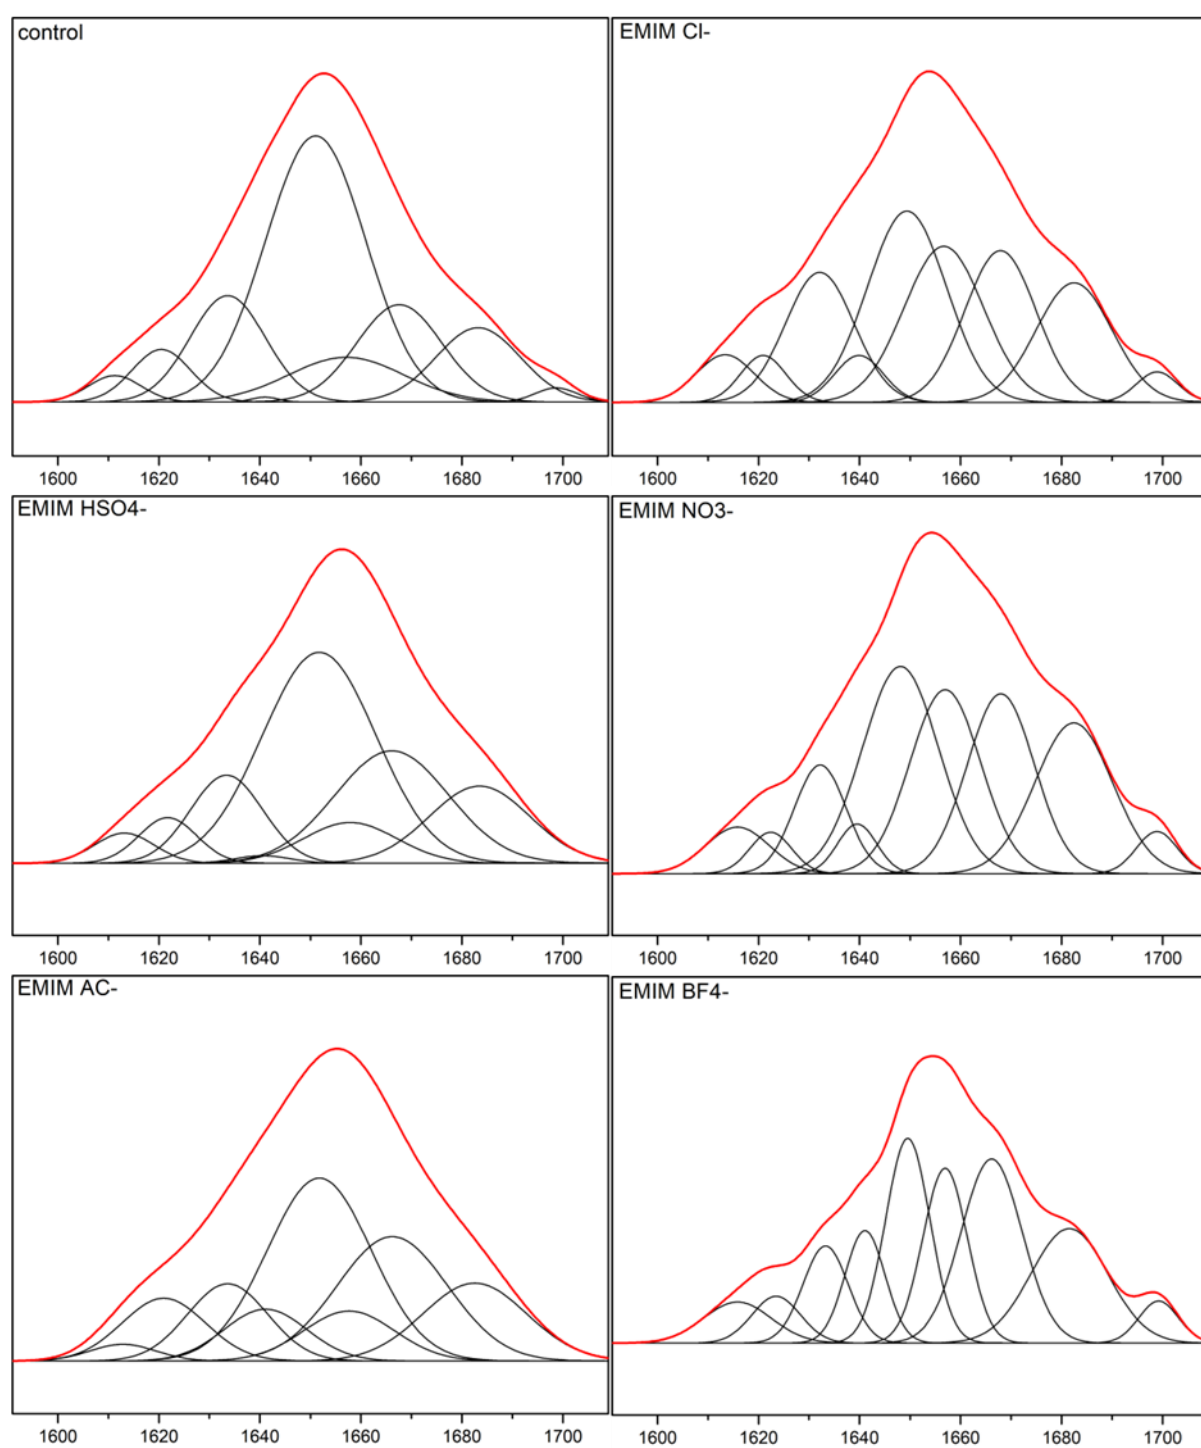

**Figure S4.** Deconvoluted spectra of insulin with individual peaks shown.

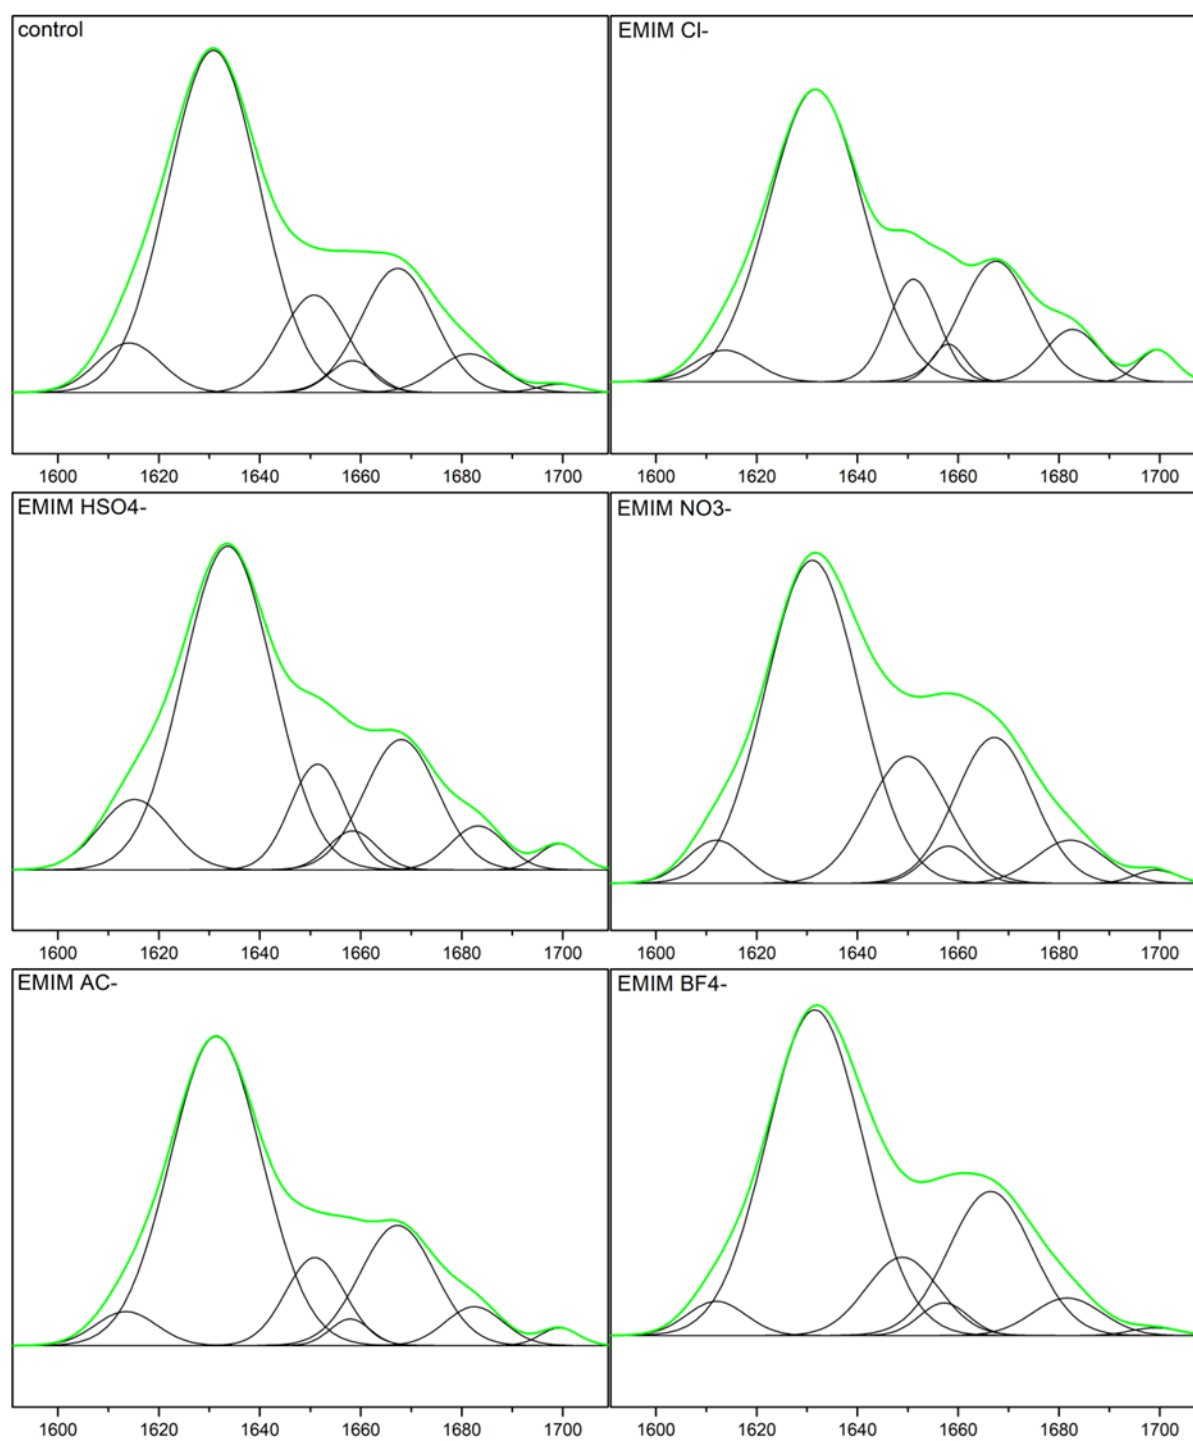

**Figure S5.** Deconvoluted spectra of insulin fibrils with individual peaks shown.
